# Supplementary material for: Comparing the Outcomes of Face-to-Face and Synchronous Online Research Mentor Training Using Propensity Score Matching
Source: PubMed Central journal article supplement — CBE Life Sci Educ. 2022 Winter;21(4):ar62. doi: 10.1187/cbe.21-12-0332 (PMC9727602; doi:10.1187/cbe.21-12-0332), 2022
Supplement: cbe-21-ar62-s001.pdf [file cbe-21-ar62-s001.pdf]

# Supplemental Material

CBE—Life Sciences Education

Rogers *et al.*

## Appendix

**Table A1**

*Survey Items for Outcome Measures*

| Outcome Measure                             | Survey Questions                                                                                                                                                                                                                                                                                                                                                                                                                                                                                                                                                                                                                                                                                                                                                                                                                                                                                                                                                                                                                                                                                                                                                                                                                                                                                                                                                                                                                                                                                                                                                                                                                                                                                                   | Response Categories                                                                                        |
|---------------------------------------------|--------------------------------------------------------------------------------------------------------------------------------------------------------------------------------------------------------------------------------------------------------------------------------------------------------------------------------------------------------------------------------------------------------------------------------------------------------------------------------------------------------------------------------------------------------------------------------------------------------------------------------------------------------------------------------------------------------------------------------------------------------------------------------------------------------------------------------------------------------------------------------------------------------------------------------------------------------------------------------------------------------------------------------------------------------------------------------------------------------------------------------------------------------------------------------------------------------------------------------------------------------------------------------------------------------------------------------------------------------------------------------------------------------------------------------------------------------------------------------------------------------------------------------------------------------------------------------------------------------------------------------------------------------------------------------------------------------------------|------------------------------------------------------------------------------------------------------------|
| Mentoring<br>Competency<br>Assessment (MCA) | <p>Please rate how skilled you feel you were BEFORE attending the research mentor training, and how skilled you feel you are NOW in each of the following areas: (Think about your skills generally, with all your mentees).</p> <p>1a. Active listening BEFORE<br/>1b. Active listening NOW<br/>2a. Providing constructive feedback BEFORE<br/>2b. Providing constructive feedback NOW<br/>3a. Establishing a relationship based on trust BEFORE<br/>3b. Establishing a relationship based on trust NOW<br/>4a. Identifying and accommodating different communication styles BEFORE<br/>4b. Identifying and accommodating different communication styles NOW<br/>5a. Employing strategies to improve communication with mentees BEFORE<br/>5b. Employing strategies to improve communication with mentees NOW<br/>6a. Coordinating effectively with your mentees' other mentors BEFORE<br/>6b. Coordinating effectively with your mentees' other mentors NOW<br/>7a. Working with mentees to set clear expectations of the mentoring relationship BEFORE<br/>7b. Working with mentees to set clear expectations of the mentoring relationship NOW<br/>8a. Aligning your expectations with your mentees' BEFORE<br/>8b. Aligning your expectations with your mentees' NOW<br/>9a. Considering how personal and professional differences may impact expectations BEFORE<br/>9b. Considering how personal and professional differences may impact expectations NOW<br/>10a. Working with mentees to set research goals BEFORE<br/>10b. Working with mentees to set research goals NOW<br/>11a. Helping mentees develop strategies to meet goals BEFORE<br/>11b. Helping mentees develop strategies to meet goals</p> | <p>1 = Not at all skilled<br/>2<br/>3<br/>4 = Moderately skilled<br/>5<br/>6<br/>7 = Extremely skilled</p> |

NOW

12a. Accurately estimating your mentees' level of scientific knowledge BEFORE

12b. Accurately estimating your mentees' level of scientific knowledge NOW

13a. Accurately estimating your mentees' ability to conduct research BEFORE

13b. Accurately estimating your mentees' ability to conduct research NOW

14a. Employing strategies to enhance your mentees' knowledge and abilities BEFORE

14b. Employing strategies to enhance your mentees' knowledge and abilities NOW

15a. Motivating your mentees BEFORE

15b. Motivating your mentees NOW

16a. Building mentees' confidence BEFORE

16b. Building mentees' confidence NOW

17a. Stimulating your mentees' creativity BEFORE

17b. Stimulating your mentees' creativity NOW

18a. Acknowledging your mentees' professional contributions BEFORE

18b. Acknowledging your mentees' professional contributions NOW

19a. Negotiating a path to professional independence with your mentees BEFORE

19b. Negotiating a path to professional independence with your mentees NOW

20a. Taking into account the biases and prejudices you bring to the mentor/mentee relationship BEFORE

20b. Taking into account the biases and prejudices you bring to the mentor/mentee relationship NOW

21a. Working effectively with mentees whose personal background is different from your own (age, race, gender, class, region, culture, religion, family composition etc.) BEFORE

21b. Working effectively with mentees whose personal background is different from your own (age, race, gender, class, region, culture, religion, family composition etc.) NOW

22a. Helping your mentees network effectively BEFORE

22b. Helping your mentees network effectively NOW

23a. Helping your mentees set career goals BEFORE

23b. Helping your mentees set career goals NOW

24a. Helping your mentees balance work with their personal life BEFORE

24b. Helping your mentees balance work with their personal life NOW

25a. Understanding your impact as a role model BEFORE

25b. Understanding your impact as a role model NOW

26a. Helping your mentees acquire resources (e.g. grants, etc.) BEFORE

26b. Helping your mentees acquire resources (e.g. grants, etc.) NOW

---

|                                                  |                                                                                                                                                                                                         |                                                                        |
|--------------------------------------------------|---------------------------------------------------------------------------------------------------------------------------------------------------------------------------------------------------------|------------------------------------------------------------------------|
| Overall Quality of the Mentoring                 | How would you rate the overall quality of the mentoring you are able to provide, thinking back to before the training and now, after the training?<br>- Before the training<br><br>- After the training | 1 = Very low<br>2<br>3<br>4 = Average<br>5<br>6<br>7 = Very high       |
| Ability to Meet Mentees' Expectations            | To what extent do you feel that you are meeting your mentees' expectations thinking back to before the training and now, after the training?<br>- Before the training<br><br>- After the training       | 1 = Not at all<br>2<br>3<br>4 = Moderately<br>5<br>6<br>7 = Completely |
| Mentor's Intended Changes to Mentoring Practices | Have you made any, or do you plan to make any changes in your mentoring as a result of this training?                                                                                                   | 1 = Yes<br>2 = No                                                      |

---

**Table A2***Baseline Models using OLS Regression with All Covariates (including all Pre-treatment Covariates)*

|                                                             | <b>MCA Skill Gains</b> | <b>Overall Quality Gains</b> | <b>Meeting Expectation Gains</b> | <b>Changes</b>      |
|-------------------------------------------------------------|------------------------|------------------------------|----------------------------------|---------------------|
| (Intercept)                                                 | 0.945***<br>(0.290)    | 1.072***<br>(0.356)          | 1.028**<br>(0.411)               | 1.002***<br>(0.108) |
| Platform - Online                                           | 0.011<br>(0.087)       | -0.045<br>(0.110)            | -0.004<br>(0.130)                | 0.055<br>(0.033)    |
| Dosage                                                      | 0.011<br>(0.032)       | 0.015<br>(0.039)             | -0.024<br>(0.045)                | 0.001<br>(0.012)    |
| Facilitator Effectiveness<br>(compared to “Very Effective”) |                        |                              |                                  |                     |
| Effective                                                   | -0.178***<br>(0.056)   | -0.243***<br>(0.073)         | -0.212**<br>(0.084)              | 0.067***<br>(0.022) |
| Neither                                                     | -0.659***<br>(0.145)   | -1.096***<br>(0.228)         | -0.749***<br>(0.262)             | 0.296***<br>(0.061) |
| Ineffective                                                 | -0.400<br>(0.254)      | -1.247***<br>(0.430)         | -1.012**<br>(0.495)              | 0.340**<br>(0.133)  |
| Very Ineffective                                            | -0.363<br>(0.358)      | -0.075<br>(0.736)            | 0.071<br>(0.846)                 | -0.037<br>(0.228)   |
| Missing (NA)                                                | -0.525***<br>(0.100)   | -0.917<br>(0.738)            | -0.687<br>(0.847)                | 0.963***<br>(0.228) |
| Race/Ethnicity (compared to “Well<br>Represented”)          |                        |                              |                                  |                     |
| Historically Excluded                                       | -0.019<br>(0.062)      | 0.092<br>(0.087)             | 0.006<br>(0.108)                 | -0.029<br>(0.027)   |
| Prefer not to answer                                        | 0.080<br>(0.199)       | 0.057<br>(0.218)             | 0.051<br>(0.276)                 | 0.188***<br>(0.065) |
| Sex (compared to “Female”)                                  |                        |                              |                                  |                     |
| Male                                                        | -0.018<br>(0.051)      | -0.043<br>(0.070)            | -0.013<br>(0.084)                | -0.004<br>(0.021)   |
| Other                                                       | -0.102<br>(0.313)      | 0.266<br>(0.379)             | 0.230<br>(0.435)                 | -0.026<br>(0.117)   |

|                                                   |                     |                      |                      |                      |
|---------------------------------------------------|---------------------|----------------------|----------------------|----------------------|
| Prefer not to answer                              | -0.297<br>(0.251)   | 0.026<br>(0.283)     | -0.006<br>(0.348)    | -0.021<br>(0.086)    |
| Previous Mentor Experience<br>(compared to “Yes”) |                     |                      |                      |                      |
| No                                                | 0.227***<br>(0.071) | 0.299***<br>(0.087)  | 0.352***<br>(0.101)  | 0.003<br>(0.026)     |
| Missing (NA)                                      | -0.249<br>(0.183)   | 0.760<br>(0.752)     | --                   | -0.950***<br>(0.232) |
| Mentor’s years of Experience                      | -0.009**<br>(0.004) | -0.020***<br>(0.005) | -0.019***<br>(0.006) | 0.000<br>(0.002)     |
| Mentor’s years of Experience (NA)                 | -0.129<br>(0.141)   | -0.171<br>(0.147)    | -0.099<br>(0.200)    | 0.060<br>(0.045)     |
| Title (compared to “Faculty”)                     |                     |                      |                      |                      |
| Graduate                                          | 0.296***<br>(0.081) | 0.246**<br>(0.111)   | 0.223*<br>(0.132)    | 0.019<br>(0.034)     |
| Postdoc                                           | 0.092<br>(0.092)    | 0.219*<br>(0.123)    | 0.186<br>(0.151)     | -0.012<br>(0.038)    |
| ReaSci                                            | 0.091<br>(0.094)    | 0.271**<br>(0.126)   | 0.192<br>(0.150)     | -0.033<br>(0.039)    |
| Other                                             | 0.043<br>(0.099)    | -0.063<br>(0.122)    | -0.039<br>(0.143)    | 0.001<br>(0.038)     |
| NA                                                | 0.140<br>(0.282)    | 0.069<br>(0.339)     | 0.121<br>(0.391)     | -0.044<br>(0.105)    |
| Mentees’ Career Stage (Faculty)                   | 0.056<br>(0.065)    | 0.136<br>(0.100)     | 0.120<br>(0.115)     | 0.010<br>(0.030)     |
| Mentees’ Career Stage (Graduate)                  | -0.140**<br>(0.068) | -0.120<br>(0.084)    | 0.022<br>(0.097)     | 0.011<br>(0.026)     |
| Mentees’ Career Stage (Undergraduate)             | -0.082<br>(0.073)   | -0.138<br>(0.090)    | -0.107<br>(0.104)    | -0.025<br>(0.028)    |
| Mentees’ Career Stage (None)                      | 0.148<br>(0.137)    | 0.227<br>(0.169)     | 0.097<br>(0.199)     | 0.070<br>(0.053)     |

*Notes.* Robust standard errors are in parentheses.

\*  $p < .1$  \*\*  $p < .05$  \*\*\*  $p < .01$ .

**Table A3***Compare Models using OLS Regression with Selected Covariates with Models using Propensity Score Matching*

|                                                             | MCA Skill Gains      |                      | Overall Quality Gains |                      | Meeting Expectation<br>Gains |                     | Changes             |                     |
|-------------------------------------------------------------|----------------------|----------------------|-----------------------|----------------------|------------------------------|---------------------|---------------------|---------------------|
|                                                             | OLS<br>Model         | PSM<br>Model         | OLS<br>Model          | PSM<br>Model         | OLS<br>Model                 | PSM<br>Model        | OLS<br>Model        | PSM<br>Model        |
| (Intercept)                                                 | 0.556**<br>(0.275)   | 0.344<br>(0.274)     | 0.607*<br>(0.339)     | -0.087<br>(0.337)    | 0.759**<br>(0.380)           | 0.794**<br>(0.391)  | 1.024***<br>(0.097) | 1.040***<br>(0.086) |
| Platform - Online                                           | 0.027<br>(0.082)     | 0.114<br>(0.090)     | -0.075<br>(0.106)     | 0.128<br>(0.110)     | -0.056<br>(0.121)            | 0.098<br>(0.128)    | 0.030<br>(0.030)    | 0.031<br>(0.028)    |
| Dosage                                                      | 0.039<br>(0.032)     | 0.064*<br>(0.033)    | 0.043<br>(0.040)      | 0.113***<br>(0.040)  | -0.007<br>(0.044)            | -0.008<br>(0.047)   | -0.000<br>(0.011)   | -0.001<br>(0.010)   |
| Facilitator Effectiveness<br>(compared to “Very Effective”) |                      |                      |                       |                      |                              |                     |                     |                     |
| Effective                                                   | -0.162***<br>(0.057) | -0.134**<br>(0.062)  | -0.203***<br>(0.076)  | -0.131<br>(0.081)    | -0.173**<br>(0.085)          | -0.152<br>(0.094)   | 0.067***<br>(0.022) | 0.085***<br>(0.021) |
| Neither                                                     | -0.669***<br>(0.150) | -0.630***<br>(0.175) | -1.069***<br>(0.236)  | -1.073***<br>(0.281) | -0.741***<br>(0.264)         | -0.811**<br>(0.324) | 0.304***<br>(0.060) | 0.292***<br>(0.066) |
| Ineffective                                                 | -0.376<br>(0.262)    | -0.398<br>(0.285)    | -1.164***<br>(0.448)  | -1.125**<br>(0.469)  | -0.947*<br>(0.500)           | -1.007*<br>(0.542)  | 0.325**<br>(0.132)  | 0.426***<br>(0.121) |
| Very Ineffective                                            | -0.481<br>(0.368)    | -0.484<br>(0.414)    | -0.259<br>(0.768)     | -0.265<br>(0.872)    | -0.069<br>(0.857)            | -0.049<br>(1.007)   | -0.016<br>(0.226)   | 0.003<br>(0.225)    |
| Missing (NA)                                                | -0.565***<br>(0.103) | -0.540***<br>(0.113) | -0.948<br>(0.771)     | -0.816<br>(0.874)    | -0.700<br>(0.860)            | -0.726<br>(1.008)   | 0.977***<br>(0.227) | 0.969***<br>(0.226) |
| Race/Ethnicity (compared to “Well<br>Represented”)          |                      |                      |                       |                      |                              |                     |                     |                     |
| Historically Excluded                                       | 0.015<br>(0.063)     | 0.102*<br>(0.055)    | 0.138<br>(0.090)      | 0.234***<br>(0.074)  | 0.038<br>(0.107)             | 0.275***<br>(0.089) | -0.025<br>(0.026)   | -0.014<br>(0.019)   |
| Prefer not to answer                                        | 0.044<br>(0.204)     | -0.012<br>(0.228)    | -0.005<br>(0.227)     | -0.011<br>(0.254)    | -0.013<br>(0.278)            | 0.029<br>(0.321)    | 0.198***<br>(0.064) | 0.192***<br>(0.063) |
| Sex (compared to “Female”)                                  |                      |                      |                       |                      |                              |                     |                     |                     |
| Male                                                        | -0.028<br>(0.052)    | -0.067<br>(0.054)    | -0.068<br>(0.071)     | -0.038<br>(0.074)    | -0.043<br>(0.083)            | -0.058<br>(0.089)   | -0.004<br>(0.021)   | -0.013<br>(0.019)   |
| Other                                                       | -0.202<br>(0.320)    | -0.382<br>(0.364)    | 0.099<br>(0.390)      | -0.109<br>(0.443)    | 0.154431<br>0.4347           | -0.075<br>(0.511)   | -0.022<br>(0.115)   | -0.010<br>(0.114)   |

|                                                   |                     |                     |                     |                     |                     |                     |                      |                      |
|---------------------------------------------------|---------------------|---------------------|---------------------|---------------------|---------------------|---------------------|----------------------|----------------------|
| Prefer not to answer                              | -0.394<br>(0.256)   | -0.569**<br>(0.257) | -0.122<br>(0.293)   | 0.125<br>(0.293)    | -0.163<br>(0.347)   | 0.142<br>(0.362)    | -0.037<br>(0.084)    | -0.124*<br>(0.074)   |
| Previous Mentor Experience<br>(compared to "Yes") |                     |                     |                     |                     |                     |                     |                      |                      |
| No                                                | 0.281***<br>(0.072) | 0.319***<br>(0.070) | 0.379***<br>(0.090) | 0.487***<br>(0.087) | 0.412***<br>(0.100) | 0.380***<br>(0.100) | -0.003<br>(0.026)    | -0.022<br>(0.022)    |
| Missing (NA)                                      | -0.035<br>(0.114)   | -0.097<br>(0.122)   | 1.233<br>(0.779)    | 1.296<br>(0.883)    | --                  | --                  | -0.959***<br>(0.229) | -0.959***<br>(0.228) |

*Notes.* Robust standard errors are in parentheses.

\* p < .1    \*\* p < .05    \*\*\* p < .01.



**Table A4***Data Missingness and Strategies to Impute Missing Data of Covariates*

| <b>Variable</b>                      | <b>Variable Type</b> | <b>Percent of Missing Values</b> | <b>Imputation Methods</b>                                                                                                                                                                                                                                                                                     |
|--------------------------------------|----------------------|----------------------------------|---------------------------------------------------------------------------------------------------------------------------------------------------------------------------------------------------------------------------------------------------------------------------------------------------------------|
| Treatment Indicator                  |                      |                                  |                                                                                                                                                                                                                                                                                                               |
| Platform                             | Binary               | 0                                | Not Applicable                                                                                                                                                                                                                                                                                                |
| Pre-treatment Covariates             |                      |                                  |                                                                                                                                                                                                                                                                                                               |
| Mentees' career stage: Faculty       | Binary               | 0                                | Not Applicable                                                                                                                                                                                                                                                                                                |
| Mentees' career stage: Graduate      | Binary               | 0                                | Not Applicable                                                                                                                                                                                                                                                                                                |
| Mentees' career stage: Undergraduate | Binary               | 0                                | Not Applicable                                                                                                                                                                                                                                                                                                |
| Mentees' career stage: none          | Binary               | 0                                | Not Applicable                                                                                                                                                                                                                                                                                                |
| Race/Ethnicity of mentor             | Nominal              | 0                                | Not Applicable                                                                                                                                                                                                                                                                                                |
| Sex of mentor                        | Nominal              | 8%                               | A new category was generated to indicate missing values (NA)                                                                                                                                                                                                                                                  |
| The title of mentor                  | Nominal              | 2%                               | A new category was generated to indicate missing values (NA)                                                                                                                                                                                                                                                  |
| Previous mentoring experience        | Binary               | 34%                              | A new category was generated to indicate missing values (NA)                                                                                                                                                                                                                                                  |
| Mentor's years of Experience         | Continuous           | 32%                              | Two new variables of years of experience were generated: 1) a new variable same as years of experience except replacing all missing values as 0, and 2) a binary variable binary variable with 1 indicating the missingness of years of experience and 0 representing that years of experience is not missing |
| Other Covariates                     |                      |                                  |                                                                                                                                                                                                                                                                                                               |
| Dosage                               | Continuous           | 0                                | Not Applicable                                                                                                                                                                                                                                                                                                |
| Facilitator Effectiveness            | Ordinal              | 25%                              | A new category was generated to indicate missing values (NA)                                                                                                                                                                                                                                                  |

*Notes.* The total analytical sample is 807. See more details of the analytical sample size in Figure 1.

**Table A5***Number of Treated and Control Subjects in Each Stratum Using Optimal Full Matching*

| <b>Stratum</b> | <b>Treatment (Online)</b> | <b>Control Group (Face-to-face)</b> |  | <b>Stratum</b> | <b>Treatment (Online)</b> | <b>Control Group (Face-to-face)</b> |
|----------------|---------------------------|-------------------------------------|--|----------------|---------------------------|-------------------------------------|
| m.1            | 5                         | 1                                   |  | m.29           | 1                         | 5                                   |
| m.10           | 2                         | 1                                   |  | m.3            | 1                         | 12                                  |
| m.100          | 2                         | 1                                   |  | m.30           | 1                         | 11                                  |
| m.101          | 1                         | 1                                   |  | m.31           | 1                         | 2                                   |
| m.104          | 1                         | 52                                  |  | m.36           | 1                         | 2                                   |
| m.106          | 2                         | 1                                   |  | m.37           | 1                         | 2                                   |
| m.107          | 1                         | 3                                   |  | m.39           | 1                         | 1                                   |
| m.109          | 1                         | 1                                   |  | m.43           | 1                         | 12                                  |
| m.11           | 1                         | 14                                  |  | m.46           | 4                         | 1                                   |
| m.110          | 1                         | 12                                  |  | m.5            | 1                         | 9                                   |
| m.111          | 6                         | 1                                   |  | m.51           | 1                         | 1                                   |
| m.112          | 1                         | 1                                   |  | m.57           | 12                        | 1                                   |
| m.115          | 2                         | 1                                   |  | m.62           | 6                         | 1                                   |
| m.116          | 1                         | 45                                  |  | m.64           | 5                         | 1                                   |
| m.118          | 5                         | 1                                   |  | m.65           | 1                         | 4                                   |
| m.120          | 3                         | 1                                   |  | m.66           | 4                         | 1                                   |
| m.122          | 1                         | 17                                  |  | m.67           | 1                         | 48                                  |
| m.125          | 1                         | 25                                  |  | m.69           | 1                         | 20                                  |
| m.13           | 3                         | 1                                   |  | m.71           | 5                         | 1                                   |
| m.130          | 6                         | 1                                   |  | m.73           | 1                         | 1                                   |
| m.132          | 1                         | 271                                 |  | m.74           | 1                         | 1                                   |
| m.138          | 2                         | 1                                   |  | m.76           | 5                         | 1                                   |
| m.142          | 1                         | 1                                   |  | m.77           | 1                         | 1                                   |
| m.149          | 1                         | 1                                   |  | m.79           | 1                         | 1                                   |
| m.15           | 1                         | 8                                   |  | m.8            | 2                         | 1                                   |
| m.151          | 1                         | 5                                   |  | m.82           | 1                         | 2                                   |
| m.152          | 1                         | 9                                   |  | m.86           | 4                         | 1                                   |
| m.16           | 1                         | 1                                   |  | m.87           | 6                         | 1                                   |
| m.17           | 2                         | 1                                   |  | m.91           | 7                         | 1                                   |
| m.2            | 1                         | 1                                   |  | m.96           | 1                         | 1                                   |
| m.20           | 1                         | 25                                  |  | m.98           | 3                         | 1                                   |
| m.24           | 8                         | 1                                   |  | m.99           | 3                         | 1                                   |

*Notes.* The total number of subjects is 152 for treatment group and 655 for control group.
